# Supplementary material for: Sustainable Agriculture: Nutritional Benefits of Wheat–Soybean and Maize–Sunflower Associations for Hibernation and Reproduction of Endangered Common Hamsters
Source: MDPI journal article supplement (doi:10.3390/su132413521), 2021-12-07
Supplement: s1 [file s1]

Archive with 1 entries (1 files):
- sustainability-1458587-supplementary.pdf
