# Supplementary material for: Sustainable Agriculture: Nutritional Benefits of Wheat–Soybean and Maize–Sunflower Associations for Hibernation and Reproduction of Endangered Common Hamsters
Source: MDPI journal article supplement (doi:10.3390/su132413521), 2021-12-07
Supplement: s1 [file s1 › sustainability-1458587-supplementary.pdf]

## Supplementary Materials:

**Supplementary information for:** Sustainable Agriculture: Nutritional Benefits of Wheat–Soybean and Maize–Sunflower Associations for Hibernation and Reproduction of Endangered Common Hamsters

## Supplementary Methods

**Table S1.** Macronutrient and micronutrient composition of the crops selected for the experiment. This table is based on available data before the experiment was conducted (AFZ et al., 2011; USDA SR-21, 2016). Data are given for seeds of each crop except fodder radish, as data were not available for these seeds. Avg: average.

| Analysis             | Unit      | Food Item    |              |                  |                |                      |
|----------------------|-----------|--------------|--------------|------------------|----------------|----------------------|
|                      |           | <i>Wheat</i> | <i>Maize</i> | <i>Sunflower</i> | <i>Soybean</i> | <i>Fodder Radish</i> |
| Main analysis        | Unit      | Avg          | Avg          | Avg              | Avg            | Avg                  |
| <u>Dry matter</u>    | % as fed  | 87.0         | 23.4         | 92.8             | 88.8           | /                    |
| <u>Crude protein</u> | % DM      | 12.6         | 9.4          | 16.6             | 39.6           | /                    |
| <u>Lipids</u>        | % DM      | 3.6          | 4.4          | 47.9             | 21.3           | /                    |
| <u>Total sugars</u>  | % DM      | 3.2          | 2.1          | 2.7              | 8.7            | /                    |
| <u>Starch</u>        | % DM      | 69.1         | 73.4         | 1.3              | 6.4            | /                    |
| <u>Gross energy</u>  | MJ/kg DM  | 18.2         | 18.7         | 28.7             | 23.6           | /                    |
| Minerals             | Unit      | Avg          | Avg          | Avg              | Avg            | Avg                  |
| <u>Calcium</u>       | g/kg DM   | 0.7          | 0.5          | 2.6              | 3.2            | /                    |
| <u>Magnesium</u>     | g/kg DM   | 1.2          | 1.2          | 3                | 2.4            | /                    |
| <u>Manganese</u>     | mg/kg DM  | 40           | 5            | 19               | 29             | /                    |
| <u>Zinc</u>          | mg/kg DM  | 31           | 21           | 50               | 43             | /                    |
| <u>Copper</u>        | mg/kg DM  | 6            | 5            | 18               | 19             | /                    |
| <u>Iron</u>          | mg/kg DM  | 78           | 37           | 52               | 121            | /                    |
| Amino acids          | Unit      | Avg          | Avg          | Avg              | Avg            | Avg                  |
| Leucine              | % protein | 6.5          | 12           | 6.0              | 7.5            | /                    |
| Lysine               | % protein | 2.9          | 3.1          | 3.9              | 6.2            | /                    |
| Tryptophan           | % protein | 1.2          | 0.7          | 1.6              | 1.3            | /                    |
| Fatty acids          | Unit      | Avg          | Avg          | Avg              | Avg            | Avg                  |
| Palmitic             | % lipids  | 25           | 11           | 6                | 10             | /                    |
| Palmitoleic          | % lipids  | 1            | Traces       | Traces           | Traces         | /                    |
| Stearic              | % lipids  | 1            | 2            | 5                | 4              | /                    |
| Oleic                | % lipids  | 12           | 28           | 18               | 20.7           | /                    |
| Linoleic             | % lipids  | 55           | 56           | 69               | 55             | /                    |
| Linolenic            | % lipids  | 5.4          | 1            | 0.3              | 7.3            | /                    |
| Vitamins             | Unit      | Avg          | Avg          | Avg              | Avg            | Avg                  |
| B3                   | mg/100 g  | 1.8          | <1           | 8.3              | 0.4            | /                    |

## Supplementary Results

**Table S2.** Proportions (%) of indexes 1, 2 and 3 recorded for each sex on each diet throughout winter.

| <i>Diet</i>         | % <sub>1</sub> | % <sub>2</sub> | % <sub>3</sub> | <i>Sex</i> | % <sub>1</sub> | % <sub>2</sub> | % <sub>3</sub> |
|---------------------|----------------|----------------|----------------|------------|----------------|----------------|----------------|
| <b><i>Mrad</i></b>  | 43.3           | 6.3            | 50.3           | F          | 32.9           | 4.3            | 62.9           |
|                     |                |                |                | M          | 53.8           | 8.4            | 37.8           |
| <i>Msoy</i>         | 58.3           | 9.6            | 32.1           | F          | 48.2           | 7.9            | 43.9           |
|                     |                |                |                | M          | 68.3           | 11.4           | 20.3           |
| <b><i>Msunf</i></b> | 48.2           | 4.5            | 47.3           | F          | 43.9           | 30.3           | 53.1           |
|                     |                |                |                | M          | 52.5           | 5.9            | 41.6           |
| <i>Wrad</i>         | 55.0           | 8.4            | 36.6           | F          | 54.6           | 6.7            | 38.7           |
|                     |                |                |                | M          | 55.5           | 10.0           | 34.5           |
| <b><i>Wsoy</i></b>  | 47.0           | 6.1            | 46.9           | F          | 38.5           | 6.3            | 55.2           |
|                     |                |                |                | M          | 55.5           | 5.9            | 38.7           |
| <i>Wsunf</i>        | 57.8           | 7.4            | 34.9           | F          | 30.9           | 5.0            | 34.1           |
|                     |                |                |                | M          | 54.6           | 9.7            | 35.7           |

Note: The three diets in bold are those on which individuals were significantly more active than on the three others (see Results section and Figure 1A in the manuscript and summary Figure S1 below). A score of 1 represents hamsters in deep torpor, and a score of 2 indicates individuals in shallow torpor or in a deep sleep. Finally, a score of 3 is attributed to hamsters that were either active or in a light sleep.

**Table S3.** Model selection looking at the effect of diet (base and complement), sex and body mass on activity index. Models with Delta AICc < 4 and null and full models are presented.

| <b>Full Model: Score ~ (Base+Comp+Sex+Body mass)^2+(1 Piece)+(1 Ind)+(1 Date)</b> |                                                      |           |                  |               |            |              |
|-----------------------------------------------------------------------------------|------------------------------------------------------|-----------|------------------|---------------|------------|--------------|
| Model #                                                                           | Fixed Factors in the Model                           | df        | LogLik           | AICc          | Delta AICc | Weight       |
| <b>28</b>                                                                         | <b>Base * Complement + Sex</b>                       | <b>12</b> | <b>-2619,504</b> | <b>5263,1</b> | <b>0</b>   | <b>0,084</b> |
| 10                                                                                | Base + Sex                                           | 8         | -2623,81         | 5263,7        | 0,56       | 0,063        |
| 92                                                                                | Base * Complement + Base * Sex                       | 14        | -2617,979        | 5264,1        | 0,98       | 0,051        |
| 32                                                                                | Base * Complement + Sex + Body mass                  | 13        | -2619,176        | 5264,5        | 1,36       | 0,042        |
| 74                                                                                | Base * Sex                                           | 10        | -2622,436        | 5264,9        | 1,84       | 0,033        |
| 348                                                                               | (Base + Complement + Sex)^2                          | 16        | -2616,396        | 5265          | 1,86       | 0,033        |
| 192                                                                               | (Base + Complement + Body mass)^2 + Sex              | 17        | -2615,405        | 5265          | 1,89       | 0,032        |
| 14                                                                                | Base + Sex + Body mass                               | 9         | -2623,502        | 5265,1        | 1,96       | 0,031        |
| 448                                                                               | (Base + Complement + Body mass)^2 + Complement * Sex | 20        | -2612,46         | 5265,2        | 2,08       | 0,03         |
| Null                                                                              | (Null)                                               | 1         | -2631,09         | 5272,2        | 9,09       | 0,001        |
| Full                                                                              | (Full)                                               | 22        | -2611,65         | 5267,31       | 4,21       | 0,009        |

**Table S4.** Hamsters' average body mass (g) according to their diet, sex and periods. Three periods are represented: OH = onset of hibernation, PH = post-hibernation and PR = post-reproduction. Means±SEM are shown in grams.

| PERIOD | DIET | M-SOY | M-SUNF | M-RAD | W-SOY | W-SUNF | W-RAD |
|--------|------|-------|--------|-------|-------|--------|-------|
|--------|------|-------|--------|-------|-------|--------|-------|

|        |     |              |              |              |              |              |              |
|--------|-----|--------------|--------------|--------------|--------------|--------------|--------------|
|        | OH  | 252.9 ± 14.2 | 253.1 ± 14.2 | 252.6 ± 14.2 | 253.6 ± 14.2 | 253.9 ± 14.2 | 254.1 ± 14.2 |
|        | PH  | 194.1 ± 11.9 | 231.3 ± 11.9 | 216.9 ± 11.9 | 234.6 ± 11.9 | 212.9 ± 11.9 | 188.4 ± 11.9 |
|        | PR  | 224.3 ± 12.5 | 256.1 ± 13.6 | 229.7 ± 13.2 | 257.3 ± 13.0 | 240.2 ± 12.5 | 203.2 ± 13.2 |
| PERIOD | SEX | Males        |              |              | Females      |              |              |
|        | OH  | 271.7 ± 8.2  |              |              | 235.0 ± 8.2  |              |              |
|        | PH  | 230.3 ± 6.9  |              |              | 195.8 ± 6.9  |              |              |
|        | PR  | 257.0 ± 7.1  |              |              | 213.3 ± 7.9  |              |              |

**Table S5.** Output of the model looking at the effect of the diet and the body mass on females' parturition rate. The full model is presented. Considering the limited number of fixed effects considered, we did not perform model selection. P-values from the summary and ANOVA are provided.

| Model: Parturition ~ (Diet*Body Mass) |          |    |            |          |           |         |          |
|---------------------------------------|----------|----|------------|----------|-----------|---------|----------|
| Fixed Effects                         | LR Chisq | df | Pr(>Chisq) | Estimate | Std.Error | z value | Pr(< z ) |
| Diet                                  | 6.9132   | 5  | 0.2272     |          |           |         |          |
| Body mass                             | 0.7771   | 1  | 0.3780     | 2.93     | 4.45      | 0.657   | 0.511    |
| Diet:Body mass                        | 7.8081   | 5  | 0.1671     |          |           |         |          |

**Table S6.** Model selection for the effect of the diet, the body mass and the period (birth or weaning) on litter size.

| Complete model: Litter size ~ (Diet*Period+Body mass after hibernation)+(1 Mother) |                                       |          |               |               |             |             |                                                                                                                                                                                              |
|------------------------------------------------------------------------------------|---------------------------------------|----------|---------------|---------------|-------------|-------------|----------------------------------------------------------------------------------------------------------------------------------------------------------------------------------------------|
| Model #                                                                            | Fixed Effects                         | df       | LogLik        | AICc          | Delta AICc  | Weight      | Model Outputs                                                                                                                                                                                |
| 1                                                                                  | Body mass+Period                      | 4        | -61.85        | 132.91        | 0.00        | 0.30        | Body mass: estimate 0.32±0.17,<br>X <sup>2</sup> = 2.97, p = 0.085<br><b>Period:</b> weaning estimate -1.13±0.30,<br>X <sup>2</sup> = 15.49, <b>p &lt; 0.001</b>                             |
| 2                                                                                  | Period                                | 3        | -63.21        | 133.12        | 0.21        | 0.27        | <b>Period:</b> weaning estimate -1.13±0.29,<br>X <sup>2</sup> = 16.41, <b>p &lt; 0.001</b>                                                                                                   |
| 3                                                                                  | <b>Period+Diet</b>                    | <b>8</b> | <b>-56.23</b> | <b>133.43</b> | <b>0.52</b> | <b>0.23</b> | <b>Period:</b> weaning estimate -1.13±0.29,<br>X <sup>2</sup> = 18.39, <b>p &lt; 0.001</b><br><b>Diet:</b> X <sup>2</sup> = 19.39, <b>p = 0.002</b>                                          |
| 4                                                                                  | Body mass+<br>Period+Diet             | 9        | -55.28        | 134.98        | 2.08        | 0.11        | Body mass: estimate 0.21±0.16,<br>X <sup>2</sup> = 2.22, p = 0.136<br>Period: weaning estimate -1.13 ± 0.29,<br>X <sup>2</sup> = 19.43, p < 0.001<br>Diet: X <sup>2</sup> = 18.76, p = 0.002 |
| 5                                                                                  | Period+Diet+<br>Period:Diet           | 13       | -47.21        | 135.58        | 2.68        | 0.08        | Period: X <sup>2</sup> = 33.24, p < 0.001<br>Diet: X <sup>2</sup> = 24.70, p < 0.001<br>Period:Diet: X <sup>2</sup> = 15.56, p = 0.008                                                       |
| 6                                                                                  | Body mass+Period+<br>Diet+Period:Diet | 14       | -46.25        | 138.77        | 5.86        | 0.02        |                                                                                                                                                                                              |
| 7                                                                                  | Diet                                  | 7        | -66.47        | 150.67        | 17.76       | 0.00        |                                                                                                                                                                                              |
| 8                                                                                  | Body mass                             | 3        | -72.09        | 150.88        | 17.97       | 0.00        |                                                                                                                                                                                              |
| 9                                                                                  | (Null)                                | 2        | -73.45        | 151.23        | 18.33       | 0.00        |                                                                                                                                                                                              |
| 10                                                                                 | Body mass+Diet                        | 8        | -65.52        | 152.00        | 19.09       | 0.00        |                                                                                                                                                                                              |

Note: Outputs of models with Delta AICc<4 are provided. Since models 1–3 have similar AICc values and similar weights, and considering that (i) we specifically investigated the effect of the diet in our study and that (ii) we found an effect of the diet on  $\Delta$ body mass during winter (and thus, some of the differences in body mass are explained by the diet; see §3.3), model 3 is discussed in the article (see §3.5) and written in bold in the table. Multiple comparisons between diets are presented for this model in Table S7. Significant variables in each model and corresponding p-values are represented in bold in the model outputs column.

**Table S7.** Multiple comparisons of model 3 from Table S6 on diet effect on litter size.

| <b>Model: Litter size ~ (Diet+Period)+(1 Mother)</b> |                 |              |           |                |                 |                                  |
|------------------------------------------------------|-----------------|--------------|-----------|----------------|-----------------|----------------------------------|
| <b>Contrast</b>                                      | <b>Estimate</b> | <b>SE</b>    | <b>df</b> | <b>t.ratio</b> | <b>P-Values</b> | <b>Adjusted P-Values (Tukey)</b> |
| Wrad–Wsoy                                            | –1.504          | 0.806        | 13        | –1.866         | 0.0848          | 0.4616                           |
| Wrad–Wsunf                                           | 0.000           | 0.883        | 13        | 0.000          | 1.0000          | 1.0000                           |
| Wrad–Mrad                                            | –0.629          | 0.814        | 13        | –0.772         | 0.4538          | 0.9676                           |
| Wrad–Msoy                                            | –0.262          | 0.821        | 13        | –0.319         | 0.7545          | 0.9994                           |
| Wrad–Msunf                                           | –0.916          | 0.802        | 13        | –1.143         | 0.2738          | 0.8552                           |
| <b>Wsoy–Wsunf</b>                                    | <b>1.504</b>    | <b>0.510</b> | <b>13</b> | <b>2.950</b>   | <b>0.0113</b>   | 0.0935                           |
| <b>Wsoy–Mrad</b>                                     | <b>0.875</b>    | <b>0.378</b> | <b>13</b> | <b>2.316</b>   | <b>0.0376</b>   | 0.2549                           |
| <b>Wsoy–Msoy</b>                                     | <b>1.242</b>    | <b>0.394</b> | <b>13</b> | <b>3.155</b>   | <b>0.0076</b>   | 0.0661                           |
| Wsoy–Msunf                                           | 0.588           | 0.351        | 13        | 1.673          | 0.1182          | 0.5701                           |
| Wsunf–Mrad                                           | –0.629          | 0.522        | 13        | –1.203         | 0.2503          | 0.8278                           |
| Wsunf–Msoy                                           | –0.262          | 0.534        | 13        | –0.492         | 0.6312          | 0.9956                           |
| Wsunf–Msunf                                          | –0.916          | 0.503        | 13        | –1.820         | 0.0918          | 0.4866                           |
| Mrad–Msoy                                            | 0.366           | 0.410        | 13        | 0.894          | 0.3877          | 0.9414                           |
| Mrad–Msunf                                           | –0.288          | 0.369        | 13        | –0.779         | 0.4500          | 0.9664                           |
| Msoy–Msunf                                           | –0.654          | 0.385        | 13        | –1.697         | 0.1134          | 0.5560                           |

Note: This model is the one discussed in the manuscript. Significant differences are presented in bold. Multiple comparisons were not possible with the Wrad group, as only one female gave birth, and none of her pups survived.

**Supplementary figure**

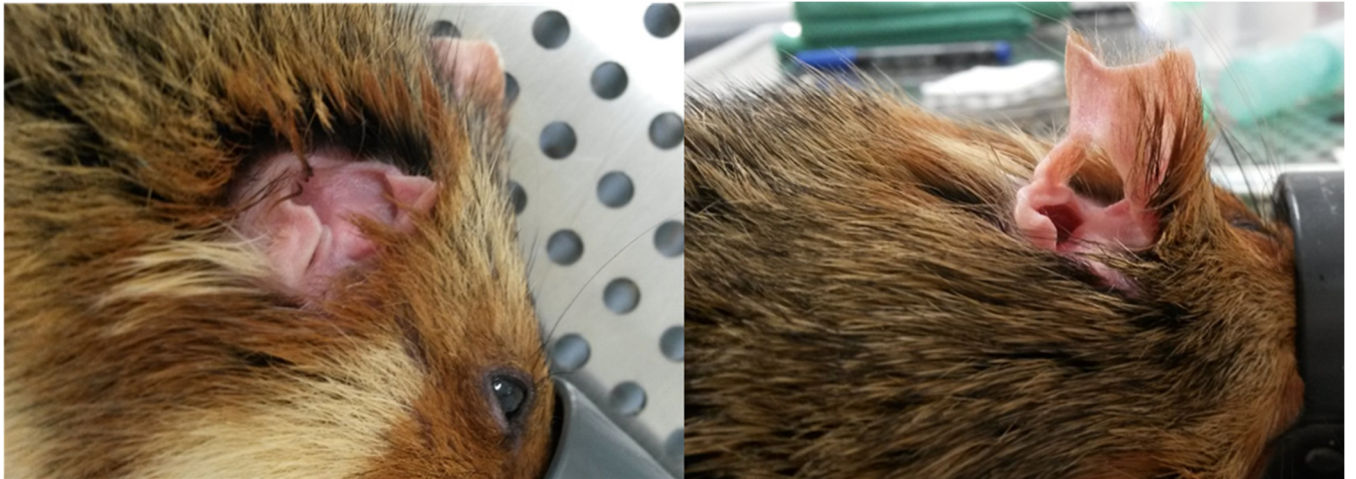

**Figure S1.** Signs of cartilage atrophy in the ears of common hamsters on the Mrad diet after hibernation. Animals were under anesthesia when the pictures were taken.
